# Supplementary material
Source: PubMed Central journal article supplement (PMC8967618)
Supplement: 7502_3_supp_93639_r16vbt.pdf [file 7502_3_supp_93639_r16vbt.pdf]

**Supplemental Table 1: The Proportion of Patients Undergoing Preemptive Kidney Re-transplant Stratified By Where Follow-Up Care Was Last Provided at the Time the Preceding Graft Failed**

| Transplant Status     | Care At Time Preceding Graft Failed Provided By |                                           |                        |              |              |
|-----------------------|-------------------------------------------------|-------------------------------------------|------------------------|--------------|--------------|
|                       | Transplant Center                               | Non-Transplant Center Specialty Physician | Primary Care Physician | Other        | Missing      |
| <b>Preemptive</b>     | 864 (11.5%)                                     | 140 (7.6%)                                | 19 (5.9%)              | 229 (8.7%)   | 1630 (15.6%) |
| <b>Non-Preemptive</b> | 6,281 (88.5%)                                   | 1650 (92.4%)                              | 292 (94.1%)            | 2358 (91.3%) | 8585 (84.4%) |

Missing data n=10,481 (46.0%)

p-value < 0.001

**Supplemental Table 2: Median Age and Sex Proportion at the Time of First and Repeat Preemptive and Non-Preemptive Kidney Transplant**

|                          | <b>Median Age (Q25, Q75)</b> | <b>Female Sex (%)</b> | <b>Male Sex (%)</b> |
|--------------------------|------------------------------|-----------------------|---------------------|
| <b>First Transplant</b>  |                              |                       |                     |
| Preemptive               | 53 (42, 62)                  | 16,663 (18.9%)        | 22,637 (16.3%)      |
| Non-Preemptive           | 53 (42, 61)                  | 71,402 (81.1%)        | 115,991 (83.7%)     |
| <b>Repeat Transplant</b> |                              |                       |                     |
| Preemptive               | 46 (37, 55)                  | 2,054 (15.6%)         | 2,299 (12.5%)       |
| Non-Preemptive           | 45 (35, 54)                  | 11,108 (84.4%)        | 16,149 (87.5%)      |

**Supplemental Table 3: Last Available Estimated Glomerular Filtration Rate Prior to Preemptive Kidney Transplant (by MDRD equation)**

|             | <b>First PKT<br/>GFR (Q25, 275)</b> | <b>P-value</b> | <b>Repeat PKT<br/>GFR (Q25, 275)</b> | <b>P-value</b> |
|-------------|-------------------------------------|----------------|--------------------------------------|----------------|
| <b>All</b>  | 13.9 (10.7, 17.5)                   | -              | 15.1 (11.6, 18.5)                    | -              |
| <b>Sex</b>  |                                     |                |                                      |                |
| Male        | 14.4 (11.0, 18.0)                   | P < 0.001      | 15.8 (12.5, 19.1)                    | P < 0.001      |
| Female      | 13.3 (10.1, 16.9)                   |                | 14.2 (11.0, 17.5)                    |                |
| <b>Race</b> |                                     |                |                                      |                |
| White       | 13.9 (10.7, 17.4)                   | Ref            | 15.1 (11.7, 18.5)                    | Ref            |
| Black       | 14.6 (10.8, 18.7)                   | P < 0.001      | 15.7 (11.9, 19.0)                    | P = 0.113      |
| Hispanic    | 13.4 (10.4, 17.0)                   | P < 0.001      | 14.2 (11.3, 17.3)                    | P = 0.024      |
| Other       | 14.1 (10.7, 17.3)                   | P = 0.883      | 15.1 (10.9, 17.3)                    | P = 0.403      |

**Supplemental Table 4: Adjusted Hazard Ratio for Death-Censored Graft Failure with Preemptive Retransplant Versus Non-Preemptive Retransplant and Preemptive First Transplant Versus Non-Preemptive First Transplant**

| Variable                                  | Repeat Transplant | First Transplant |
|-------------------------------------------|-------------------|------------------|
|                                           | HR (95% CI)       | HR (95% CI)      |
| <b>Preemptive Transplant</b>              | 0.72 (0.65-0.81)  | 0.67 (0.64-0.70) |
| <b>Employment</b>                         |                   |                  |
| <b>Full Time</b>                          | Ref               | Ref              |
| <b>Part Time/Full Time</b>                | 0.94 (0.72-1.21)  | 0.90 (0.80-1.01) |
| <b>Part Time</b>                          | 1.04 (0.91-1.18)  | 1.08 (1.02-1.15) |
| <b>Unemployed</b>                         | 1.06 (0.98-1.15)  | 1.09 (1.06-1.13) |
| <b>Retired</b>                            | 0.89 (0.74-1.07)  | 1.02 (0.96-1.07) |
| <b>Education</b>                          |                   |                  |
| <b>None/Grade School</b>                  | Ref               | Ref              |
| <b>High School</b>                        | 1.12 (0.93-1.35)  | 1.10 (1.04-1.17) |
| <b>College/Technical School</b>           | 1.04 (0.86-1.26)  | 1.04 (0.98-1.10) |
| <b>Bachelor Degree</b>                    | 0.97 (0.79-1.19)  | 0.93 (0.87-1.00) |
| <b>Graduate School</b>                    | 0.86 (0.68-1.09)  | 0.89 (0.82-0.97) |
| <b>Female Sex</b>                         | 0.94 (0.88-1.01)  | 0.98 (0.96-1.01) |
| <b>Race</b>                               |                   |                  |
| <b>White</b>                              | Ref               | Ref              |
| <b>Black</b>                              | 1.44 (1.33-1.56)  | 1.67 (1.62-1.72) |
| <b>Hispanic</b>                           | 0.87 (0.78-0.98)  | 0.94 (0.90-0.98) |
| <b>Other</b>                              | 0.76 (0.63-0.92)  | 0.94 (0.88-0.99) |
| <b>Comorbidities</b>                      |                   |                  |
| <b>Coronary Artery Disease</b>            | 0.97 (0.85-1.12)  | 1.03 (0.98-1.08) |
| <b>Hypertension</b>                       | 0.83 (0.76-0.90)  | 0.95 (0.92-0.99) |
| <b>Peripheral Vascular Disease</b>        | 0.96 (0.79-1.16)  | 1.11 (1.03-1.18) |
| <b>Diabetes</b>                           | 0.98 (0.89-1.07)  | 1.09 (1.05-1.12) |
| <b>Body Mass Index (kg/m<sup>2</sup>)</b> |                   |                  |
| <b>&lt;18.5</b>                           | Ref               | Ref              |
| <b>18.5- &lt; 25</b>                      | 1.06 (0.90-1.25)  | 1.01 (0.93-1.10) |
| <b>25- &lt; 30</b>                        | 1.15 (0.96-1.36)  | 1.08 (0.99-1.18) |
| <b>30 - &lt;35</b>                        | 1.27 (1.06-1.52)  | 1.22 (1.12-1.33) |
| <b>≥ 35</b>                               | 1.56 (1.29-1.90)  | 1.33 (1.21-1.45) |
| <b>PRA</b>                                |                   |                  |
| <b>&lt;20</b>                             | Ref               | Ref              |
| <b>20- &lt;80</b>                         | 1.07 (0.99-1.15)  | 1.01 (0.96-1.05) |
| <b>≥ 80</b>                               | 1.09 (1.00-1.19)  | 1.08 (0.99-1.17) |
| <b>Live Donor</b>                         | 0.78 (0.72-0.84)  | 0.77 (0.75-0.79) |
| <b>Age</b>                                |                   |                  |
| <b>&lt;40</b>                             | Ref               | Ref              |
| <b>40- &lt;60</b>                         | 0.67 (0.62-0.72)  | 0.60 (0.58-0.62) |
| <b>≥ 60</b>                               | 0.64 (0.56-0.74)  | 0.54 (0.52-0.57) |
| <b>ABO</b>                                |                   |                  |
| <b>O</b>                                  | Ref               | Ref              |
| <b>A</b>                                  | 1.04 (0.97-1.12)  | 0.98 (0.95-1.01) |
| <b>B</b>                                  | 0.98 (0.88-1.10)  | 0.98 (0.94-1.02) |
| <b>AB</b>                                 | 1.02 (0.88-1.20)  | 0.93 (0.87-0.99) |
